# Supplementary material for: Direct Prediction Of Intrinsically Disordered Protein Conformational Properties From Sequence
Source: Research Square preprint supplement (doi:10.21203/rs.3.rs-2990611/v1), 2023-06-16
Supplement: Supplementary file 1 [file 0b884577245cdb7827ca2b90.xlsx]

## Sheet: molecular_function
Analysis Type:	PANTHER Overrepresentation Test (Released 20221013)
Annotation Version and Release Date:	GO Ontology database DOI: 10.5281/zenodo.7709866 Released 2023-03-06
Analyzed List:	UniProt_IDs_with_expanded_IDR_regions.txt (Homo sapiens)
Reference List:	background_proteins2.txt (Homo sapiens)
Test Type:	FISHER
Correction:	FDR
GO molecular function complete	background_proteins2.txt - REFLIST (16439)	UniProt_IDs_with_expanded_IDR_regions.txt (1003)	UniProt_IDs_with_expanded_IDR_regions.txt (expected)	UniProt_IDs_with_expanded_IDR_regions.txt (over/under)	UniProt_IDs_with_expanded_IDR_regions.txt (fold Enrichment)	UniProt_IDs_with_expanded_IDR_regions.txt (raw P-value)	UniProt_IDs_with_expanded_IDR_regions.txt (FDR)
profilin binding (GO:0005522)	8	7	0.49	+	14.34	8.71e-06	0.00095
histone H3K4 monomethyltransferase activity (GO:0140945)	7	6	0.43	+	14.05	4.31e-05	0.00393
RNA polymerase II C-terminal domain binding (GO:0099122)	7	5	0.43	+	11.71	0.000351	0.0266
extracellular matrix structural constituent conferring tensile strength (GO:0030020)	41	18	2.5	+	7.2	2.79e-09	7.79e-07
histone H3K4 methyltransferase activity (GO:0042800)	17	7	1.04	+	6.75	0.000297	0.0229
SH3 domain binding (GO:0017124)	117	43	7.14	+	6.02	5.84e-18	6.52e-15
histone H3 methyltransferase activity (GO:0140938)	36	13	2.2	+	5.92	2.63e-06	0.000379
nucleosomal DNA binding (GO:0031492)	38	12	2.32	+	5.18	1.95e-05	0.00202
protein-lysine N-methyltransferase activity (GO:0016279)	50	15	3.05	+	4.92	3.08e-06	0.000417
lysine N-methyltransferase activity (GO:0016278)	51	15	3.11	+	4.82	3.78e-06	0.000483
histone methyltransferase activity (GO:0042054)	54	15	3.29	+	4.55	6.79e-06	0.000778
nucleosome binding (GO:0031491)	68	18	4.15	+	4.34	1.5e-06	0.000224
RNA polymerase binding (GO:0070063)	56	14	3.42	+	4.1	3.71e-05	0.00353
histone modifying activity (GO:0140993)	171	38	10.43	+	3.64	2.19e-10	6.51e-08
protein methyltransferase activity (GO:0008276)	77	16	4.7	+	3.41	7.37e-05	0.00645
chromatin DNA binding (GO:0031490)	116	24	7.08	+	3.39	1.38e-06	0.000213
N-methyltransferase activity (GO:0008170)	80	16	4.88	+	3.28	0.000109	0.00902
actin binding (GO:0003779)	390	76	23.8	+	3.19	1e-16	8.95e-14
chromatin binding (GO:0003682)	562	102	34.29	+	2.97	3.52e-20	7.87e-17
histone binding (GO:0042393)	228	38	13.91	+	2.73	3.24e-07	6.04e-05
extracellular matrix structural constituent (GO:0005201)	166	27	10.13	+	2.67	2.67e-05	0.00272
transcription coactivator activity (GO:0003713)	249	36	15.19	+	2.37	8.36e-06	0.000934
transcription corepressor activity (GO:0003714)	177	24	10.8	+	2.22	0.000639	0.044
mRNA binding (GO:0003729)	297	40	18.12	+	2.21	1.42e-05	0.00151
transcription coregulator activity (GO:0003712)	450	58	27.46	+	2.11	5.48e-07	9.08e-05
cytoskeletal protein binding (GO:0008092)	881	111	53.75	+	2.07	7.85e-12	2.92e-09
RNA binding (GO:0003723)	1481	186	90.36	+	2.06	2.09e-19	3.11e-16
protein domain specific binding (GO:0019904)	613	76	37.4	+	2.03	3.83e-08	9e-06
DNA-binding transcription repressor activity, RNA polymerase II-specific (GO:0001227)	312	36	19.04	+	1.89	0.000644	0.0436
tubulin binding (GO:0015631)	350	40	21.35	+	1.87	0.000376	0.028
nucleic acid binding (GO:0003676)	3710	385	226.36	+	1.7	1.54e-27	6.88e-24
zinc ion binding (GO:0008270)	706	73	43.08	+	1.69	3.7e-05	0.0036
transcription regulator activity (GO:0140110)	1686	164	102.87	+	1.59	9.72e-09	2.55e-06
protein-containing complex binding (GO:0044877)	1144	111	69.8	+	1.59	5.15e-06	0.000622
DNA binding (GO:0003677)	2409	231	146.98	+	1.57	1.03e-11	3.27e-09
sequence-specific DNA binding (GO:0043565)	1576	144	96.16	+	1.5	3.2e-06	0.000421
double-stranded DNA binding (GO:0003690)	1556	141	94.94	+	1.49	6.22e-06	0.000731
enzyme binding (GO:0019899)	1838	166	112.14	+	1.48	8.8e-07	0.00014
DNA-binding transcription factor activity (GO:0003700)	1241	107	75.72	+	1.41	0.000623	0.0435
sequence-specific double-stranded DNA binding (GO:1990837)	1470	126	89.69	+	1.4	0.000235	0.0187
heterocyclic compound binding (GO:1901363)	5267	448	321.36	+	1.39	6.49e-16	4.83e-13
organic cyclic compound binding (GO:0097159)	5326	449	324.96	+	1.38	3.16e-15	1.57e-12
metal ion binding (GO:0046872)	3741	279	228.25	+	1.22	0.000281	0.022
cation binding (GO:0043169)	3807	280	232.28	+	1.21	0.000719	0.048
protein binding (GO:0005515)	12230	800	746.19	+	1.07	0.000115	0.00933
catalytic activity (GO:0003824)	4447	194	271.33	-	0.72	3.85e-08	8.59e-06
signaling receptor binding (GO:0005102)	1315	51	80.23	-	0.64	0.000542	0.0384
hydrolase activity (GO:0016787)	1995	71	121.72	-	0.58	4.3e-07	7.39e-05
salt transmembrane transporter activity (GO:1901702)	535	12	32.64	-	0.37	7.61e-05	0.00654
monoatomic cation transmembrane transporter activity (GO:0008324)	548	12	33.44	-	0.36	4.22e-05	0.00392
monoatomic ion transmembrane transporter activity (GO:0015075)	662	14	40.39	-	0.35	4.2e-06	0.000521
inorganic cation transmembrane transporter activity (GO:0022890)	508	10	30.99	-	0.32	3.06e-05	0.00304
inorganic molecular entity transmembrane transporter activity (GO:0015318)	616	12	37.58	-	0.32	2.85e-06	0.000398
transmembrane transporter activity (GO:0022857)	980	15	59.79	-	0.25	8.4e-12	2.89e-09
transporter activity (GO:0005215)	1074	16	65.53	-	0.24	4.49e-13	1.83e-10
signaling receptor activity (GO:0038023)	1105	13	67.42	-	0.19	8.31e-16	5.3e-13
molecular transducer activity (GO:0060089)	1105	13	67.42	-	0.19	8.31e-16	4.64e-13
G protein-coupled receptor activity (GO:0004930)	460	5	28.07	-	0.18	2.77e-07	5.63e-05
transmembrane signaling receptor activity (GO:0004888)	897	9	54.73	-	0.16	4.34e-14	1.94e-11
receptor ligand activity (GO:0048018)	419	4	25.56	-	0.16	4.09e-07	7.31e-05
signaling receptor activator activity (GO:0030546)	426	4	25.99	-	0.15	2.85e-07	5.54e-05
signaling receptor regulator activity (GO:0030545)	472	4	28.8	-	0.14	3.45e-08	8.55e-06
secondary active transmembrane transporter activity (GO:0015291)	248	2	15.13	-	0.13	9.1e-05	0.00767
cytokine activity (GO:0005125)	177	1	10.8	-	0.09	0.000529	0.0381
active transmembrane transporter activity (GO:0022804)	380	2	23.19	-	0.09	7.94e-08	1.69e-05
active monoatomic ion transmembrane transporter activity (GO:0022853)	219	1	13.36	-	0.07	5.52e-05	0.00493
immune receptor activity (GO:0140375)	140	0	8.54	-	< 0.01	0.000391	0.0287

## Sheet: cellular_component
	Analysis Type:	PANTHER Overrepresentation Test (Released 20221013)
	Annotation Version and Release Date:	GO Ontology database DOI: 10.5281/zenodo.7709866 Released 2023-03-06
	Analyzed List:	UniProt_IDs_with_expanded_IDR_regions.txt (Homo sapiens)
	Reference List:	background_proteins2.txt (Homo sapiens)
	Test Type:	FISHER
	Correction:	FDR
	GO cellular component complete	background_proteins2.txt - REFLIST (16439)	UniProt_IDs_with_expanded_IDR_regions.txt (1003)	UniProt_IDs_with_expanded_IDR_regions.txt (expected)	UniProt_IDs_with_expanded_IDR_regions.txt (over/under)	UniProt_IDs_with_expanded_IDR_regions.txt (fold Enrichment)	UniProt_IDs_with_expanded_IDR_regions.txt (raw P-value)	UniProt_IDs_with_expanded_IDR_regions.txt (FDR)
	prespliceosome (GO:0071010)	14	10	0.85	+	11.71	3.54e-07	1.95e-05
	U2-type prespliceosome (GO:0071004)	14	10	0.85	+	11.71	3.54e-07	1.9e-05
	basement membrane collagen trimer (GO:0098651)	8	5	0.49	+	10.24	0.000543	0.0113
	collagen network (GO:0098645)	8	5	0.49	+	10.24	0.000543	0.0112
	network-forming collagen trimer (GO:0098642)	8	5	0.49	+	10.24	0.000543	0.011
	U1 snRNP (GO:0005685)	15	9	0.92	+	9.83	3.95e-06	0.00015
	WASH complex (GO:0071203)	12	7	0.73	+	9.56	5.57e-05	0.0016
	MOZ/MORF histone acetyltransferase complex (GO:0070776)	7	4	0.43	+	9.37	0.00259	0.0427
	MLL3/4 complex (GO:0044666)	11	6	0.67	+	8.94	0.000255	0.00578
	SCAR complex (GO:0031209)	11	6	0.67	+	8.94	0.000255	0.00571
	complex of collagen trimers (GO:0098644)	21	10	1.28	+	7.8	5.53e-06	0.000201
	U2 snRNP (GO:0005686)	19	8	1.16	+	6.9	9.67e-05	0.00239
	fibrillar collagen trimer (GO:0005583)	12	5	0.73	+	6.83	0.00215	0.0375
	banded collagen fibril (GO:0098643)	12	5	0.73	+	6.83	0.00215	0.0371
	spliceosomal snRNP complex (GO:0097525)	47	16	2.87	+	5.58	3.6e-07	1.88e-05
	M band (GO:0031430)	21	7	1.28	+	5.46	0.00083	0.016
	small nuclear ribonucleoprotein complex (GO:0030532)	54	16	3.29	+	4.86	1.67e-06	7.14e-05
	podosome (GO:0002102)	27	8	1.65	+	4.86	0.000681	0.0135
	transcription elongation factor complex (GO:0008023)	42	12	2.56	+	4.68	4.44e-05	0.00132
	Sm-like protein family complex (GO:0120114)	62	17	3.78	+	4.49	1.95e-06	8.17e-05
	collagen trimer (GO:0005581)	88	24	5.37	+	4.47	1.73e-08	1.15e-06
	SWI/SNF complex (GO:0016514)	26	7	1.59	+	4.41	0.00233	0.0394
	actin filament (GO:0005884)	94	24	5.74	+	4.18	5.03e-08	3.04e-06
	histone methyltransferase complex (GO:0035097)	60	15	3.66	+	4.1	1.98e-05	0.000646
	SWI/SNF superfamily-type complex (GO:0070603)	86	21	5.25	+	4	6.38e-07	3.16e-05
	histone deacetylase complex (GO:0000118)	77	18	4.7	+	3.83	6.7e-06	0.000239
	U2-type spliceosomal complex (GO:0005684)	73	16	4.45	+	3.59	4.24e-05	0.0013
	methyltransferase complex (GO:0034708)	86	18	5.25	+	3.43	2.45e-05	0.000789
	actomyosin (GO:0042641)	72	15	4.39	+	3.41	0.00012	0.00285
	contractile actin filament bundle (GO:0097517)	64	13	3.9	+	3.33	0.000413	0.00916
	stress fiber (GO:0001725)	64	13	3.9	+	3.33	0.000413	0.00905
	lamellipodium (GO:0030027)	171	34	10.43	+	3.26	2.19e-08	1.41e-06
	inclusion body (GO:0016234)	69	13	4.21	+	3.09	0.000769	0.015
	actin filament bundle (GO:0032432)	70	13	4.27	+	3.04	0.000865	0.0165
	ATPase complex (GO:1904949)	115	21	7.02	+	2.99	3.22e-05	0.00102
	nuclear speck (GO:0016607)	381	65	23.25	+	2.8	6.02e-12	7.26e-10
	heterochromatin (GO:0000792)	83	14	5.06	+	2.76	0.00127	0.0236
	nuclear periphery (GO:0034399)	131	22	7.99	+	2.75	6.44e-05	0.00173
	spliceosomal complex (GO:0005681)	173	29	10.56	+	2.75	4.88e-06	0.000181
	nuclear matrix (GO:0016363)	109	17	6.65	+	2.56	0.00144	0.0261
	actin cytoskeleton (GO:0015629)	437	67	26.66	+	2.51	1.46e-10	1.28e-08
	nuclear body (GO:0016604)	771	118	47.04	+	2.51	6.54e-18	1.58e-15
	site of polarized growth (GO:0030427)	156	22	9.52	+	2.31	0.000879	0.0166
	growth cone (GO:0030426)	152	21	9.27	+	2.26	0.00136	0.0248
	cell leading edge (GO:0031252)	373	51	22.76	+	2.24	6.86e-07	3.31e-05
	nuclear protein-containing complex (GO:0140513)	1062	134	64.8	+	2.07	3.4e-14	5.04e-12
	nuclear chromosome (GO:0000228)	200	25	12.2	+	2.05	0.00206	0.0361
	endoplasmic reticulum lumen (GO:0005788)	293	34	17.88	+	1.9	0.00103	0.0194
	chromatin (GO:0000785)	1288	144	78.59	+	1.83	1.96e-11	2.1e-09
	nucleoplasm (GO:0005654)	3648	397	222.58	+	1.78	5.7e-33	1.1e-29
	chromosome (GO:0005694)	1800	192	109.82	+	1.75	1.65e-13	2.12e-11
	nuclear lumen (GO:0031981)	3962	417	241.74	+	1.73	7.21e-32	4.64e-29
	transcription regulator complex (GO:0005667)	480	48	29.29	+	1.64	0.00163	0.0292
	supramolecular polymer (GO:0099081)	923	89	56.32	+	1.58	5.11e-05	0.0015
	supramolecular complex (GO:0099080)	1234	116	75.29	+	1.54	1.06e-05	0.000367
	organelle lumen (GO:0043233)	4902	459	299.09	+	1.53	8.79e-25	4.24e-22
	intracellular organelle lumen (GO:0070013)	4902	459	299.09	+	1.53	8.79e-25	3.39e-22
	membrane-enclosed lumen (GO:0031974)	4902	459	299.09	+	1.53	8.79e-25	2.83e-22
	supramolecular fiber (GO:0099512)	915	84	55.83	+	1.5	0.00044	0.00954
	nucleus (GO:0005634)	6689	602	408.12	+	1.48	8.01e-33	7.73e-30
	intracellular non-membrane-bounded organelle (GO:0043232)	4708	415	287.25	+	1.44	7.83e-17	1.68e-14
	non-membrane-bounded organelle (GO:0043228)	4709	415	287.31	+	1.44	7.9e-17	1.52e-14
	cytoskeleton (GO:0005856)	2129	177	129.9	+	1.36	4.27e-05	0.00129
	catalytic complex (GO:1902494)	1382	113	84.32	+	1.34	0.00247	0.0411
	protein-containing complex (GO:0032991)	4877	357	297.56	+	1.2	9.31e-05	0.00233
	intracellular organelle (GO:0043229)	11333	804	691.47	+	1.16	9.49e-15	1.67e-12
	intracellular membrane-bounded organelle (GO:0043231)	10345	733	631.18	+	1.16	3.91e-11	3.77e-09
	intracellular anatomical structure (GO:0005622)	12570	864	766.94	+	1.13	1.15e-13	1.58e-11
	organelle (GO:0043226)	11988	821	731.43	+	1.12	1.29e-10	1.18e-08
	membrane-bounded organelle (GO:0043227)	11225	758	684.88	+	1.11	8.76e-07	4.12e-05
	endomembrane system (GO:0012505)	3994	197	243.69	-	0.81	0.000698	0.0138
	membrane (GO:0016020)	8082	347	493.11	-	0.7	1.67e-19	4.6e-17
	cell periphery (GO:0071944)	5346	227	326.18	-	0.7	2.31e-11	2.35e-09
	intracellular vesicle (GO:0097708)	2145	91	130.87	-	0.7	0.000174	0.00409
	cytoplasmic vesicle (GO:0031410)	2141	90	130.63	-	0.69	0.000116	0.00281
	vesicle (GO:0031982)	3269	134	199.45	-	0.67	1.71e-07	9.72e-06
	extracellular space (GO:0005615)	2680	108	163.52	-	0.66	1.53e-06	6.7e-05
	organelle subcompartment (GO:0031984)	1181	47	72.06	-	0.65	0.00221	0.0377
	plasma membrane region (GO:0098590)	1185	47	72.3	-	0.65	0.00182	0.0323
	extracellular exosome (GO:0070062)	1621	63	98.9	-	0.64	0.000111	0.0027
	plasma membrane (GO:0005886)	4896	190	298.72	-	0.64	3.25e-14	5.23e-12
	extracellular vesicle (GO:1903561)	1642	63	100.18	-	0.63	6.13e-05	0.00171
	extracellular organelle (GO:0043230)	1643	63	100.25	-	0.63	6.13e-05	0.00169
	extracellular membrane-bounded organelle (GO:0065010)	1643	63	100.25	-	0.63	6.13e-05	0.00167
	extracellular region (GO:0005576)	3453	132	210.68	-	0.63	4.87e-10	3.76e-08
	bounding membrane of organelle (GO:0098588)	1802	62	109.95	-	0.56	5.05e-07	2.57e-05
	organelle membrane (GO:0031090)	3028	104	184.75	-	0.56	9.32e-12	1.06e-09
	envelope (GO:0031975)	1015	31	61.93	-	0.5	1.97e-05	0.000666
	organelle envelope (GO:0031967)	1015	31	61.93	-	0.5	1.97e-05	0.000654
	membrane protein complex (GO:0098796)	1092	33	66.63	-	0.5	8.05e-06	0.000282
	endosome membrane (GO:0010008)	486	14	29.65	-	0.47	0.0024	0.0402
	lytic vacuole (GO:0000323)	626	16	38.19	-	0.42	9.11e-05	0.00234
	lysosome (GO:0005764)	626	16	38.19	-	0.42	9.11e-05	0.00231
	Golgi membrane (GO:0000139)	536	13	32.7	-	0.4	0.000175	0.00406
	secretory vesicle (GO:0099503)	874	21	53.33	-	0.39	9.11e-07	4.19e-05
	mitochondrion (GO:0005739)	1344	32	82	-	0.39	3.53e-10	2.84e-08
	side of membrane (GO:0098552)	573	13	34.96	-	0.37	4.22e-05	0.00131
	secretory granule (GO:0030141)	722	16	44.05	-	0.36	2.28e-06	9.37e-05
	cell surface (GO:0009986)	894	19	54.55	-	0.35	4.85e-08	3.02e-06
	external side of plasma membrane (GO:0009897)	397	7	24.22	-	0.29	8.58e-05	0.00227
	receptor complex (GO:0043235)	490	7	29.9	-	0.23	1.23e-06	5.53e-05
	secretory granule lumen (GO:0034774)	245	3	14.95	-	0.2	0.000496	0.0106
	cytoplasmic vesicle lumen (GO:0060205)	247	3	15.07	-	0.2	0.000504	0.0107
	vesicle lumen (GO:0031983)	249	3	15.19	-	0.2	0.000518	0.0109
	mitochondrial envelope (GO:0005740)	611	7	37.28	-	0.19	3.5e-09	2.6e-07
	plasma membrane signaling receptor complex (GO:0098802)	280	3	17.08	-	0.18	8.72e-05	0.00227
	mitochondrial membrane (GO:0031966)	571	6	34.84	-	0.17	5.31e-09	3.8e-07
	vacuolar membrane (GO:0005774)	384	4	23.43	-	0.17	2.43e-06	9.76e-05
	lytic vacuole membrane (GO:0098852)	350	3	21.35	-	0.14	2.45e-06	9.65e-05
	lysosomal membrane (GO:0005765)	350	3	21.35	-	0.14	2.45e-06	9.46e-05
	mitochondrial matrix (GO:0005759)	415	3	25.32	-	0.12	9.35e-08	5.47e-06
	organelle inner membrane (GO:0019866)	426	2	25.99	-	0.08	5.33e-09	3.67e-07
	mitochondrial protein-containing complex (GO:0098798)	222	1	13.54	-	0.07	5.81e-05	0.00165
	immunoglobulin complex (GO:0019814)	155	0	9.46	-	< 0.01	0.000177	0.00407
	blood microparticle (GO:0072562)	121	0	7.38	-	< 0.01	0.00131	0.024
	mitochondrial inner membrane (GO:0005743)	378	0	23.06	-	< 0.01	3.32e-10	2.78e-08
	ribosomal subunit (GO:0044391)	139	0	8.48	-	< 0.01	0.000641	0.0129

## Sheet: biological_process
Analysis Type:	PANTHER Overrepresentation Test (Released 20221013)
Annotation Version and Release Date:	GO Ontology database DOI: 10.5281/zenodo.7709866 Released 2023-03-06
Analyzed List:	UniProt_IDs_with_expanded_IDR_regions.txt (Homo sapiens)
Reference List:	background_proteins2.txt (Homo sapiens)
Test Type:	FISHER
Correction:	FDR
GO biological process complete	background_proteins2.txt - REFLIST (16439)	UniProt_IDs_with_expanded_IDR_regions.txt (1003)	UniProt_IDs_with_expanded_IDR_regions.txt (expected)	UniProt_IDs_with_expanded_IDR_regions.txt (over/under)	UniProt_IDs_with_expanded_IDR_regions.txt (fold Enrichment)	UniProt_IDs_with_expanded_IDR_regions.txt (raw P-value)	UniProt_IDs_with_expanded_IDR_regions.txt (FDR)
regulation of mRNA polyadenylation (GO:1900363)	11	7	0.67	+	10.43	3.7e-05	0.00466
Arp2/3 complex-mediated actin nucleation (GO:0034314)	15	9	0.92	+	9.83	3.95e-06	0.000649
positive regulation of actin nucleation (GO:0051127)	12	7	0.73	+	9.56	5.57e-05	0.00667
actin nucleation (GO:0045010)	23	13	1.4	+	9.26	4.66e-08	1.05e-05
mRNA splice site selection (GO:0006376)	31	14	1.89	+	7.4	1.23e-07	2.55e-05
U2-type prespliceosome assembly (GO:1903241)	18	7	1.1	+	6.37	0.000392	0.0355
actin polymerization or depolymerization (GO:0008154)	51	19	3.11	+	6.11	8.88e-09	2.4e-06
histone lysine methylation (GO:0034968)	52	19	3.17	+	5.99	1.15e-08	3.04e-06
regulation of actin nucleation (GO:0051125)	36	13	2.2	+	5.92	2.63e-06	0.000452
regulation of Arp2/3 complex-mediated actin nucleation (GO:0034315)	28	10	1.71	+	5.85	4.08e-05	0.00509
histone H3-K4 methylation (GO:0051568)	31	11	1.89	+	5.82	1.77e-05	0.00255
regulation of heterochromatin organization (GO:0120261)	23	8	1.4	+	5.7	0.00028	0.0273
regulation of heterochromatin formation (GO:0031445)	23	8	1.4	+	5.7	0.00028	0.0271
spliceosomal complex assembly (GO:0000245)	64	22	3.9	+	5.63	2.05e-09	5.97e-07
actin filament polymerization (GO:0030041)	32	11	1.95	+	5.63	2.26e-05	0.00316
histone methylation (GO:0016571)	68	22	4.15	+	5.3	5.17e-09	1.47e-06
peptidyl-lysine methylation (GO:0018022)	64	19	3.9	+	4.87	1.75e-07	3.44e-05
nucleosome assembly (GO:0006334)	81	23	4.94	+	4.65	1.82e-08	4.44e-06
chromosome condensation (GO:0030261)	39	11	2.38	+	4.62	0.000101	0.0112
nucleosome organization (GO:0034728)	101	26	6.16	+	4.22	1.22e-08	3.12e-06
actin filament organization (GO:0007015)	224	56	13.67	+	4.1	1.43e-16	2.7e-13
positive regulation of DNA-templated transcription, elongation (GO:0032786)	56	13	3.42	+	3.8	0.000133	0.014
cell junction maintenance (GO:0034331)	48	11	2.93	+	3.76	0.000473	0.0415
protein methylation (GO:0006479)	102	23	6.22	+	3.7	6.33e-07	0.000114
protein alkylation (GO:0008213)	102	23	6.22	+	3.7	6.33e-07	0.000112
regulation of mRNA processing (GO:0050684)	134	29	8.18	+	3.55	4.89e-08	1.09e-05
RNA splicing, via transesterification reactions (GO:0000375)	218	44	13.3	+	3.31	1.24e-10	5.37e-08
mRNA splicing, via spliceosome (GO:0000398)	215	43	13.12	+	3.28	2.59e-10	1.06e-07
RNA splicing, via transesterification reactions with bulged adenosine as nucleophile (GO:0000377)	215	43	13.12	+	3.28	2.59e-10	1.03e-07
regulation of protein depolymerization (GO:1901879)	71	14	4.33	+	3.23	0.000327	0.0311
regulation of DNA-templated transcription elongation (GO:0032784)	97	19	5.92	+	3.21	3.29e-05	0.00435
chromatin remodeling (GO:0006338)	401	78	24.47	+	3.19	4.24e-17	9.15e-14
protein-DNA complex assembly (GO:0065004)	167	32	10.19	+	3.14	1.19e-07	2.49e-05
RNA splicing (GO:0008380)	336	63	20.5	+	3.07	2.12e-13	1.78e-10
actin cytoskeleton organization (GO:0030036)	475	88	28.98	+	3.04	5.28e-18	1.99e-14
chromatin organization (GO:0006325)	599	110	36.55	+	3.01	4.57e-22	6.9e-18
regulation of mRNA splicing, via spliceosome (GO:0048024)	104	19	6.35	+	2.99	7.51e-05	0.00879
protein-DNA complex subunit organization (GO:0071824)	187	34	11.41	+	2.98	1.45e-07	2.92e-05
regulation of RNA splicing (GO:0043484)	176	32	10.74	+	2.98	3.35e-07	6.33e-05
mRNA processing (GO:0006397)	410	74	25.02	+	2.96	8.79e-15	1.21e-11
histone modification (GO:0016570)	317	56	19.34	+	2.9	3.65e-11	1.78e-08
actin filament-based process (GO:0030029)	531	92	32.4	+	2.84	3.85e-17	9.7e-14
protein polymerization (GO:0051258)	93	16	5.67	+	2.82	0.000488	0.0426
positive regulation of supramolecular fiber organization (GO:1902905)	149	25	9.09	+	2.75	2.13e-05	0.003
regulation of actin filament organization (GO:0110053)	226	37	13.79	+	2.68	5.72e-07	0.000104
ribonucleoprotein complex assembly (GO:0022618)	165	26	10.07	+	2.58	4.96e-05	0.00609
ribonucleoprotein complex subunit organization (GO:0071826)	172	27	10.49	+	2.57	3.6e-05	0.00469
regulation of supramolecular fiber organization (GO:1902903)	325	51	19.83	+	2.57	1.38e-08	3.48e-06
positive regulation of cytoskeleton organization (GO:0051495)	166	26	10.13	+	2.57	5.25e-05	0.00635
mRNA metabolic process (GO:0016071)	553	85	33.74	+	2.52	2.78e-13	2.21e-10
supramolecular fiber organization (GO:0097435)	521	77	31.79	+	2.42	2.25e-11	1.17e-08
peptidyl-lysine modification (GO:0018205)	245	36	14.95	+	2.41	6.47e-06	0.00102
regulation of actin cytoskeleton organization (GO:0032956)	292	42	17.82	+	2.36	2.03e-06	0.000352
regulation of protein polymerization (GO:0032271)	167	24	10.19	+	2.36	0.000407	0.0366
regulation of actin filament-based process (GO:0032970)	329	45	20.07	+	2.24	2.65e-06	0.000449
regulation of cytoskeleton organization (GO:0051493)	453	59	27.64	+	2.13	3.41e-07	6.36e-05
regulation of mRNA metabolic process (GO:1903311)	281	36	17.14	+	2.1	0.000121	0.0131
RNA processing (GO:0006396)	766	95	46.74	+	2.03	6.79e-10	2.39e-07
extracellular matrix organization (GO:0030198)	262	32	15.99	+	2	0.000534	0.0461
extracellular structure organization (GO:0043062)	263	32	16.05	+	1.99	0.000553	0.0472
negative regulation of organelle organization (GO:0010639)	289	35	17.63	+	1.98	0.000388	0.0353
negative regulation of transcription by RNA polymerase II (GO:0000122)	942	110	57.47	+	1.91	7.41e-10	2.54e-07
ribonucleoprotein complex biogenesis (GO:0022613)	379	44	23.12	+	1.9	0.000178	0.0183
cytoskeleton organization (GO:0007010)	1118	128	68.21	+	1.88	7.24e-11	3.21e-08
positive regulation of transcription by RNA polymerase II (GO:0045944)	1194	131	72.85	+	1.8	5.66e-10	2.03e-07
RNA metabolic process (GO:0016070)	1449	158	88.41	+	1.79	9.4e-12	5.07e-09
DNA-templated transcription (GO:0006351)	569	62	34.72	+	1.79	3.61e-05	0.00466
negative regulation of RNA biosynthetic process (GO:1902679)	1249	136	76.21	+	1.78	3.95e-10	1.46e-07
RNA biosynthetic process (GO:0032774)	579	63	35.33	+	1.78	2.97e-05	0.00407
nucleic acid-templated transcription (GO:0097659)	570	62	34.78	+	1.78	3.69e-05	0.00469
positive regulation of RNA metabolic process (GO:0051254)	1720	186	104.94	+	1.77	1.67e-13	1.58e-10
positive regulation of nucleic acid-templated transcription (GO:1903508)	1594	172	97.26	+	1.77	2.15e-12	1.35e-09
positive regulation of DNA-templated transcription (GO:0045893)	1594	172	97.26	+	1.77	2.15e-12	1.3e-09
negative regulation of DNA-templated transcription (GO:0045892)	1242	134	75.78	+	1.77	1.12e-09	3.61e-07
negative regulation of nucleic acid-templated transcription (GO:1903507)	1243	134	75.84	+	1.77	1.14e-09	3.58e-07
positive regulation of RNA biosynthetic process (GO:1902680)	1598	172	97.5	+	1.76	2.33e-12	1.35e-09
regulation of transcription by RNA polymerase II (GO:0006357)	2285	245	139.42	+	1.76	1.31e-17	3.96e-14
negative regulation of nucleobase-containing compound metabolic process (GO:0045934)	1460	156	89.08	+	1.75	5.23e-11	2.47e-08
negative regulation of RNA metabolic process (GO:0051253)	1353	143	82.55	+	1.73	7.85e-10	2.63e-07
positive regulation of nucleobase-containing compound metabolic process (GO:0045935)	1892	197	115.44	+	1.71	7.2e-13	4.94e-10
cell morphogenesis (GO:0000902)	633	64	38.62	+	1.66	0.000233	0.0231
negative regulation of macromolecule biosynthetic process (GO:0010558)	1440	145	87.86	+	1.65	1.22e-08	3.17e-06
positive regulation of macromolecule biosynthetic process (GO:0010557)	1793	180	109.4	+	1.65	1.45e-10	6.09e-08
negative regulation of cellular biosynthetic process (GO:0031327)	1476	146	90.06	+	1.62	3.31e-08	7.68e-06
nucleic acid metabolic process (GO:0090304)	1999	197	121.97	+	1.62	7.23e-11	3.31e-08
regulation of organelle organization (GO:0033043)	1030	101	62.84	+	1.61	8.54e-06	0.00128
regulation of RNA metabolic process (GO:0051252)	3439	335	209.83	+	1.6	6.9e-19	3.48e-15
protein-containing complex assembly (GO:0065003)	1068	104	65.16	+	1.6	8.82e-06	0.00131
positive regulation of cellular biosynthetic process (GO:0031328)	1860	181	113.49	+	1.59	1.37e-09	4.15e-07
negative regulation of biosynthetic process (GO:0009890)	1518	147	92.62	+	1.59	9.17e-08	2.01e-05
regulation of nucleobase-containing compound metabolic process (GO:0019219)	3689	354	225.08	+	1.57	4.02e-19	3.04e-15
positive regulation of biosynthetic process (GO:0009891)	1909	182	116.47	+	1.56	5.21e-09	1.46e-06
regulation of RNA biosynthetic process (GO:2001141)	3162	299	192.92	+	1.55	8.53e-15	1.29e-11
regulation of DNA-templated transcription (GO:0006355)	3149	297	192.13	+	1.55	1.49e-14	1.73e-11
regulation of nucleic acid-templated transcription (GO:1903506)	3151	297	192.25	+	1.54	1.53e-14	1.65e-11
protein-containing complex organization (GO:0043933)	1192	112	72.73	+	1.54	1.41e-05	0.00206
regulation of cellular component biogenesis (GO:0044087)	854	80	52.11	+	1.54	0.000373	0.0344
negative regulation of cellular metabolic process (GO:0031324)	2023	184	123.43	+	1.49	1.11e-07	2.41e-05
negative regulation of nitrogen compound metabolic process (GO:0051172)	2146	195	130.93	+	1.49	4.65e-08	1.06e-05
regulation of macromolecule biosynthetic process (GO:0010556)	3581	317	218.49	+	1.45	2.94e-12	1.64e-09
nucleobase-containing compound metabolic process (GO:0006139)	2326	204	141.92	+	1.44	2.66e-07	5.08e-05
positive regulation of cellular metabolic process (GO:0031325)	2698	236	164.61	+	1.43	2.3e-08	5.52e-06
regulation of cellular biosynthetic process (GO:0031326)	3667	318	223.74	+	1.42	2.95e-11	1.49e-08
positive regulation of nitrogen compound metabolic process (GO:0051173)	2837	245	173.1	+	1.42	2.68e-08	6.33e-06
regulation of gene expression (GO:0010468)	4402	377	268.58	+	1.4	5.31e-13	3.82e-10
negative regulation of macromolecule metabolic process (GO:0010605)	2477	212	151.13	+	1.4	6.75e-07	0.000118
cellular component organization (GO:0016043)	4851	414	295.98	+	1.4	1.93e-14	1.95e-11
cellular component organization or biogenesis (GO:0071840)	5028	428	306.78	+	1.4	5.17e-15	8.68e-12
regulation of biosynthetic process (GO:0009889)	3756	319	229.17	+	1.39	3.2e-10	1.21e-07
regulation of nitrogen compound metabolic process (GO:0051171)	5056	429	308.48	+	1.39	9.58e-15	1.21e-11
cellular component assembly (GO:0022607)	2081	175	126.97	+	1.38	2.38e-05	0.0033
cellular aromatic compound metabolic process (GO:0006725)	2474	208	150.95	+	1.38	3.2e-06	0.000531
regulation of cellular component organization (GO:0051128)	2179	183	132.95	+	1.38	1.79e-05	0.00254
heterocycle metabolic process (GO:0046483)	2451	205	149.54	+	1.37	5.63e-06	0.000905
cellular component biogenesis (GO:0044085)	2288	191	139.6	+	1.37	1.41e-05	0.00204
gene expression (GO:0010467)	2065	172	125.99	+	1.37	5.17e-05	0.0063
regulation of cellular metabolic process (GO:0031323)	4911	409	299.64	+	1.36	1.3e-12	8.54e-10
regulation of primary metabolic process (GO:0080090)	5198	431	317.15	+	1.36	2.87e-13	2.17e-10
positive regulation of macromolecule metabolic process (GO:0010604)	3173	261	193.6	+	1.35	4.63e-07	8.53e-05
regulation of macromolecule metabolic process (GO:0060255)	5513	453	336.37	+	1.35	1.73e-13	1.54e-10
negative regulation of metabolic process (GO:0009892)	2671	219	162.97	+	1.34	7.79e-06	0.0012
nervous system development (GO:0007399)	2029	164	123.8	+	1.32	0.000333	0.0314
cellular nitrogen compound metabolic process (GO:0034641)	2738	217	167.05	+	1.3	7.72e-05	0.00897
organic cyclic compound metabolic process (GO:1901360)	2656	210	162.05	+	1.3	0.000111	0.0121
positive regulation of metabolic process (GO:0009893)	3423	270	208.85	+	1.29	7.94e-06	0.00121
organelle organization (GO:0006996)	2640	207	161.08	+	1.29	0.000214	0.0215
regulation of metabolic process (GO:0019222)	5927	459	361.63	+	1.27	1.1e-09	3.62e-07
system development (GO:0048731)	3209	245	195.79	+	1.25	0.000235	0.0232
negative regulation of cellular process (GO:0048523)	4232	319	258.21	+	1.24	3.27e-05	0.00437
positive regulation of cellular process (GO:0048522)	4910	369	299.58	+	1.23	5.66e-06	0.0009
multicellular organism development (GO:0007275)	3574	268	218.06	+	1.23	0.000301	0.029
negative regulation of biological process (GO:0048519)	4726	349	288.35	+	1.21	5.93e-05	0.00706
developmental process (GO:0032502)	5084	370	310.19	+	1.19	9.71e-05	0.0108
positive regulation of biological process (GO:0048518)	5518	399	336.67	+	1.19	6.66e-05	0.00786
regulation of cellular process (GO:0050794)	9418	635	574.62	+	1.11	0.000174	0.0181
regulation of biological process (GO:0050789)	10041	668	612.64	+	1.09	0.000507	0.044
response to stimulus (GO:0050896)	6684	351	407.81	-	0.86	0.000385	0.0353
signaling (GO:0023052)	4200	207	256.26	-	0.81	0.000431	0.0383
cell communication (GO:0007154)	4337	212	264.62	-	0.8	0.000209	0.0212
transport (GO:0006810)	3228	153	196.95	-	0.78	0.000541	0.0464
immune system process (GO:0002376)	1899	81	115.86	-	0.7	0.000576	0.0489
organic substance transport (GO:0071702)	1878	79	114.58	-	0.69	0.000368	0.0343
biological process involved in interspecies interaction between organisms (GO:0044419)	1261	47	76.94	-	0.61	0.000262	0.0257
response to biotic stimulus (GO:0009607)	1139	42	69.49	-	0.6	0.000457	0.0404
organic substance catabolic process (GO:1901575)	1302	48	79.44	-	0.6	0.000155	0.0163
catabolic process (GO:0009056)	1526	56	93.11	-	0.6	3.35e-05	0.0044
response to other organism (GO:0051707)	1096	37	66.87	-	0.55	9.21e-05	0.0104
response to external biotic stimulus (GO:0043207)	1098	37	66.99	-	0.55	9.27e-05	0.0104
immune response (GO:0006955)	1345	45	82.06	-	0.55	8.19e-06	0.00124
cellular catabolic process (GO:0044248)	807	25	49.24	-	0.51	0.000231	0.0231
inorganic ion transmembrane transport (GO:0098660)	658	19	40.15	-	0.47	0.000372	0.0345
carbohydrate derivative metabolic process (GO:1901135)	695	20	42.4	-	0.47	0.000208	0.0212
monoatomic ion transmembrane transport (GO:0034220)	746	21	45.52	-	0.46	9.11e-05	0.0103
monoatomic ion transport (GO:0006811)	889	24	54.24	-	0.44	7.19e-06	0.00112
organophosphate metabolic process (GO:0019637)	651	17	39.72	-	0.43	8.72e-05	0.00998
amide metabolic process (GO:0043603)	606	14	36.97	-	0.38	3.14e-05	0.00424
G protein-coupled receptor signaling pathway (GO:0007186)	739	17	45.09	-	0.38	3.04e-06	0.00051
regulation of hormone levels (GO:0010817)	437	10	26.66	-	0.38	0.000429	0.0384
organonitrogen compound biosynthetic process (GO:1901566)	977	21	59.61	-	0.35	1.49e-08	3.7e-06
carbohydrate derivative biosynthetic process (GO:1901137)	419	9	25.56	-	0.35	0.00032	0.0306
cellular lipid metabolic process (GO:0044255)	655	14	39.96	-	0.35	4.05e-06	0.000658
transmembrane transport (GO:0055085)	1088	23	66.38	-	0.35	1.35e-09	4.15e-07
small molecule metabolic process (GO:0044281)	1098	22	66.99	-	0.33	2.77e-10	1.07e-07
lipid metabolic process (GO:0006629)	887	17	54.12	-	0.31	7.15e-09	1.96e-06
lipid biosynthetic process (GO:0008610)	439	8	26.78	-	0.3	4.95e-05	0.00613
lipid localization (GO:0010876)	313	5	19.1	-	0.26	0.000353	0.0331
mitochondrion organization (GO:0007005)	366	5	22.33	-	0.22	3.65e-05	0.00467
carboxylic acid metabolic process (GO:0019752)	528	7	32.22	-	0.22	2.28e-07	4.41e-05
oxoacid metabolic process (GO:0043436)	539	7	32.89	-	0.21	1.7e-07	3.37e-05
organic acid metabolic process (GO:0006082)	544	7	33.19	-	0.21	1.17e-07	2.48e-05
monocarboxylic acid metabolic process (GO:0032787)	318	4	19.4	-	0.21	8.25e-05	0.00951
organic anion transport (GO:0015711)	304	3	18.55	-	0.16	3.11e-05	0.00423
adaptive immune response (GO:0002250)	558	5	34.05	-	0.15	1.82e-09	5.38e-07
fatty acid metabolic process (GO:0006631)	209	1	12.75	-	0.08	0.000126	0.0136
tRNA metabolic process (GO:0006399)	153	0	9.34	-	< 0.01	0.000176	0.0182
small molecule biosynthetic process (GO:0044283)	279	0	17.02	-	< 0.01	1.44e-07	2.93e-05
organic acid biosynthetic process (GO:0016053)	165	0	10.07	-	< 0.01	0.000127	0.0136
carboxylic acid biosynthetic process (GO:0046394)	165	0	10.07	-	< 0.01	0.000127	0.0135
