# Supplementary material for: Direct Prediction Of Intrinsically Disordered Protein Conformational Properties From Sequence
Source: Research Square preprint supplement (doi:10.21203/rs.3.rs-2990611/v1), 2023-06-16
Supplement: Supplementary file 2 [file 0cf0672a9542d5e6ed6632e4.xlsx]

## Sheet: BIOLOGICAL_PROCESS
	Analysis Type:	PANTHER Overrepresentation Test (Released 20221013)
	Annotation Version and Release Date:	GO Ontology database DOI: 10.5281/zenodo.7709866 Released 2023-03-06
	Analyzed List:	UniProt_IDs_with_collased_IDR_regions.txt (Homo sapiens)
	Reference List:	background_proteins2.txt (Homo sapiens)
	Test Type:	FISHER
	Correction:	FDR
	GO biological process complete	background_proteins2.txt - REFLIST (16439)	UniProt_IDs_with_collased_IDR_regions.txt (1137)	UniProt_IDs_with_collased_IDR_regions.txt (expected)	UniProt_IDs_with_collased_IDR_regions.txt (over/under)	UniProt_IDs_with_collased_IDR_regions.txt (fold Enrichment)	UniProt_IDs_with_collased_IDR_regions.txt (raw P-value)	UniProt_IDs_with_collased_IDR_regions.txt (FDR)
	3'-UTR-mediated mRNA stabilization (GO:0070935)	19	11	1.31	+	8.37	1.38e-06	0.000165
	positive regulation of mRNA splicing, via spliceosome (GO:0048026)	29	14	2.01	+	6.98	2.76e-07	3.9e-05
	stress granule assembly (GO:0034063)	23	10	1.59	+	6.29	2.9e-05	0.0028
	regulation of cytoplasmic translation (GO:2000765)	28	12	1.94	+	6.2	5.2e-06	0.000565
	mRNA stabilization (GO:0048255)	56	24	3.87	+	6.2	1.11e-10	2.51e-08
	negative regulation of mRNA catabolic process (GO:1902373)	68	28	4.7	+	5.95	6.73e-12	1.67e-09
	regulation of alternative mRNA splicing, via spliceosome (GO:0000381)	54	22	3.73	+	5.89	1.41e-09	2.81e-07
	intracellular estrogen receptor signaling pathway (GO:0030520)	20	8	1.38	+	5.78	0.00029	0.0239
	positive regulation of mRNA processing (GO:0050685)	38	15	2.63	+	5.71	8.05e-07	0.000101
	RNA stabilization (GO:0043489)	64	25	4.43	+	5.65	2.2e-10	4.82e-08
	keratinization (GO:0031424)	50	19	3.46	+	5.49	4.56e-08	7.4e-06
	positive regulation of RNA splicing (GO:0033120)	43	16	2.97	+	5.38	6.58e-07	8.57e-05
	negative regulation of RNA catabolic process (GO:1902369)	78	29	5.39	+	5.38	2.11e-11	5.15e-09
	intermediate filament organization (GO:0045109)	73	27	5.05	+	5.35	1.14e-10	2.53e-08
	negative regulation of mRNA metabolic process (GO:1903312)	92	34	6.36	+	5.34	4.56e-13	1.23e-10
	regulation of mRNA splicing, via spliceosome (GO:0048024)	104	36	7.19	+	5	4.59e-13	1.22e-10
	histone lysine methylation (GO:0034968)	52	17	3.6	+	4.73	1.3e-06	0.000158
	histone H3-K4 methylation (GO:0051568)	31	10	2.14	+	4.66	0.000218	0.0186
	positive regulation of translational initiation (GO:0045948)	28	9	1.94	+	4.65	0.000459	0.0356
	regulation of mRNA processing (GO:0050684)	134	43	9.27	+	4.64	2.17e-14	6.84e-12
	intermediate filament cytoskeleton organization (GO:0045104)	92	29	6.36	+	4.56	5.27e-10	1.08e-07
	intermediate filament-based process (GO:0045103)	93	29	6.43	+	4.51	6.49e-10	1.31e-07
	keratinocyte differentiation (GO:0030216)	103	32	7.12	+	4.49	9.22e-11	2.14e-08
	cell fate commitment involved in formation of primary germ layer (GO:0060795)	29	9	2.01	+	4.49	0.000567	0.0429
	regulation of mRNA catabolic process (GO:0061013)	167	49	11.55	+	4.24	6.06e-15	2.03e-12
	regulation of mRNA stability (GO:0043488)	150	44	10.37	+	4.24	1.49e-13	4.42e-11
	positive regulation of mRNA metabolic process (GO:1903313)	117	34	8.09	+	4.2	1.08e-10	2.46e-08
	regulation of RNA splicing (GO:0043484)	176	51	12.17	+	4.19	2.56e-15	8.79e-13
	regulation of mRNA metabolic process (GO:1903311)	281	81	19.44	+	4.17	1.65e-23	1.32e-20
	regulation of RNA stability (GO:0043487)	161	45	11.14	+	4.04	3.28e-13	9.01e-11
	peptidyl-lysine methylation (GO:0018022)	64	17	4.43	+	3.84	1.34e-05	0.00135
	histone methylation (GO:0016571)	68	18	4.7	+	3.83	7.84e-06	0.000816
	intracellular steroid hormone receptor signaling pathway (GO:0030518)	48	12	3.32	+	3.61	0.000392	0.0312
	positive regulation of mRNA catabolic process (GO:0061014)	81	20	5.6	+	3.57	6.1e-06	0.000653
	mRNA destabilization (GO:0061157)	68	16	4.7	+	3.4	8.29e-05	0.0075
	RNA splicing (GO:0008380)	336	78	23.24	+	3.36	6.17e-18	2.91e-15
	epidermal cell differentiation (GO:0009913)	159	36	11	+	3.27	9.68e-09	1.74e-06
	RNA destabilization (GO:0050779)	72	16	4.98	+	3.21	0.000147	0.0129
	negative regulation of translation (GO:0017148)	162	36	11.2	+	3.21	1.47e-08	2.58e-06
	steroid hormone mediated signaling pathway (GO:0043401)	69	15	4.77	+	3.14	0.000289	0.0239
	positive regulation of translation (GO:0045727)	136	29	9.41	+	3.08	7.61e-07	9.74e-05
	RNA-mediated gene silencing (GO:0031047)	97	20	6.71	+	2.98	5.77e-05	0.00534
	mRNA processing (GO:0006397)	410	82	28.36	+	2.89	1.53e-15	5.5e-13
	negative regulation of amide metabolic process (GO:0034249)	185	37	12.8	+	2.89	9.86e-08	1.52e-05
	protein methylation (GO:0006479)	102	20	7.05	+	2.83	0.000105	0.00943
	protein alkylation (GO:0008213)	102	20	7.05	+	2.83	0.000105	0.00937
	RNA splicing, via transesterification reactions (GO:0000375)	218	42	15.08	+	2.79	3.45e-08	5.79e-06
	negative regulation of cellular catabolic process (GO:0031330)	183	35	12.66	+	2.77	5.47e-07	7.25e-05
	mRNA splicing, via spliceosome (GO:0000398)	215	40	14.87	+	2.69	1.99e-07	2.86e-05
	RNA splicing, via transesterification reactions with bulged adenosine as nucleophile (GO:0000377)	215	40	14.87	+	2.69	1.99e-07	2.83e-05
	skin development (GO:0043588)	226	42	15.63	+	2.69	9.74e-08	1.52e-05
	positive regulation of amide metabolic process (GO:0034250)	164	30	11.34	+	2.64	9.68e-06	0.000994
	mRNA metabolic process (GO:0016071)	553	100	38.25	+	2.61	4.16e-16	1.57e-13
	epidermis development (GO:0008544)	273	46	18.88	+	2.44	3.78e-07	5.14e-05
	post-transcriptional regulation of gene expression (GO:0010608)	454	76	31.4	+	2.42	6.23e-11	1.49e-08
	chromatin organization (GO:0006325)	599	100	41.43	+	2.41	3.81e-14	1.17e-11
	epigenetic regulation of gene expression (GO:0040029)	157	26	10.86	+	2.39	0.00019	0.0163
	regulation of translation (GO:0006417)	374	61	25.87	+	2.36	9.31e-09	1.69e-06
	chromatin remodeling (GO:0006338)	401	65	27.74	+	2.34	4.45e-09	8.39e-07
	positive regulation of transcription by RNA polymerase II (GO:0045944)	1194	181	82.58	+	2.19	3.83e-21	2.41e-18
	histone modification (GO:0016570)	317	48	21.93	+	2.19	2.56e-06	0.000289
	peptidyl-lysine modification (GO:0018205)	245	37	16.95	+	2.18	4.06e-05	0.00383
	negative regulation of catabolic process (GO:0009895)	300	45	20.75	+	2.17	6.81e-06	0.000724
	RNA processing (GO:0006396)	766	114	52.98	+	2.15	7.96e-13	2.07e-10
	positive regulation of RNA metabolic process (GO:0051254)	1720	255	118.96	+	2.14	6.79e-29	6.41e-26
	regulation of amide metabolic process (GO:0034248)	428	63	29.6	+	2.13	1.9e-07	2.77e-05
	macromolecule methylation (GO:0043414)	218	32	15.08	+	2.12	0.000223	0.0189
	epithelial cell differentiation (GO:0030855)	542	78	37.49	+	2.08	1.51e-08	2.62e-06
	regulation of RNA metabolic process (GO:0051252)	3439	489	237.86	+	2.06	3.53e-58	5.33e-54
	positive regulation of nucleobase-containing compound metabolic process (GO:0045935)	1892	269	130.86	+	2.06	4.35e-28	3.86e-25
	negative regulation of RNA metabolic process (GO:0051253)	1353	191	93.58	+	2.04	3.01e-19	1.62e-16
	positive regulation of nucleic acid-templated transcription (GO:1903508)	1594	225	110.25	+	2.04	8.38e-23	6.33e-20
	positive regulation of DNA-templated transcription (GO:0045893)	1594	225	110.25	+	2.04	8.38e-23	6.02e-20
	regulation of transcription by RNA polymerase II (GO:0006357)	2285	322	158.04	+	2.04	7.04e-34	7.59e-31
	positive regulation of RNA biosynthetic process (GO:1902680)	1598	225	110.53	+	2.04	1.01e-22	6.94e-20
	negative regulation of nucleobase-containing compound metabolic process (GO:0045934)	1460	204	100.98	+	2.02	5.44e-20	3.04e-17
	positive regulation of macromolecule biosynthetic process (GO:0010557)	1793	248	124.01	+	2	4.51e-24	3.78e-21
	regulation of nucleobase-containing compound metabolic process (GO:0019219)	3689	507	255.15	+	1.99	1.08e-56	8.18e-53
	methylation (GO:0032259)	256	35	17.71	+	1.98	0.000407	0.0322
	negative regulation of macromolecule biosynthetic process (GO:0010558)	1440	196	99.6	+	1.97	4.11e-18	2.07e-15
	negative regulation of transcription by RNA polymerase II (GO:0000122)	942	128	65.15	+	1.96	6.09e-12	1.53e-09
	negative regulation of cellular biosynthetic process (GO:0031327)	1476	199	102.09	+	1.95	5.94e-18	2.89e-15
	positive regulation of cellular biosynthetic process (GO:0031328)	1860	249	128.65	+	1.94	1.62e-22	1.06e-19
	regulation of DNA-templated transcription (GO:0006355)	3149	421	217.8	+	1.93	1.45e-41	3.65e-38
	regulation of nucleic acid-templated transcription (GO:1903506)	3151	421	217.94	+	1.93	2.37e-41	4.48e-38
	DNA-templated transcription (GO:0006351)	569	76	39.35	+	1.93	3.21e-07	4.45e-05
	regulation of RNA biosynthetic process (GO:2001141)	3162	422	218.7	+	1.93	1.81e-41	3.9e-38
	nucleic acid-templated transcription (GO:0097659)	570	76	39.42	+	1.93	3.34e-07	4.59e-05
	RNA metabolic process (GO:0016070)	1449	193	100.22	+	1.93	5.3e-17	2.22e-14
	RNA biosynthetic process (GO:0032774)	579	77	40.05	+	1.92	3.8e-07	5.12e-05
	in utero embryonic development (GO:0001701)	358	47	24.76	+	1.9	8.98e-05	0.00807
	negative regulation of biosynthetic process (GO:0009890)	1518	199	104.99	+	1.9	8.96e-17	3.66e-14
	regulation of macromolecule biosynthetic process (GO:0010556)	3581	469	247.68	+	1.89	1.55e-45	5.84e-42
	negative regulation of RNA biosynthetic process (GO:1902679)	1249	163	86.39	+	1.89	1.18e-13	3.56e-11
	negative regulation of DNA-templated transcription (GO:0045892)	1242	162	85.9	+	1.89	1.55e-13	4.5e-11
	positive regulation of biosynthetic process (GO:0009891)	1909	249	132.04	+	1.89	4.44e-21	2.68e-18
	negative regulation of nucleic acid-templated transcription (GO:1903507)	1243	162	85.97	+	1.88	1.6e-13	4.55e-11
	chordate embryonic development (GO:0043009)	606	78	41.91	+	1.86	1.01e-06	0.000126
	regulation of cellular biosynthetic process (GO:0031326)	3667	471	253.63	+	1.86	1.72e-43	5.18e-40
	regulation of cellular catabolic process (GO:0031329)	561	72	38.8	+	1.86	3.16e-06	0.000351
	negative regulation of cellular metabolic process (GO:0031324)	2023	259	139.92	+	1.85	6.7e-21	3.89e-18
	embryo development ending in birth or egg hatching (GO:0009792)	626	79	43.3	+	1.82	1.51e-06	0.000179
	regulation of biosynthetic process (GO:0009889)	3756	472	259.78	+	1.82	3.03e-41	5.08e-38
	regulation of gene expression (GO:0010468)	4402	539	304.46	+	1.77	2.71e-46	1.37e-42
	epithelium development (GO:0060429)	958	117	66.26	+	1.77	1.95e-08	3.35e-06
	negative regulation of nitrogen compound metabolic process (GO:0051172)	2146	259	148.43	+	1.74	7.51e-18	3.44e-15
	nucleic acid metabolic process (GO:0090304)	1999	241	138.26	+	1.74	2.06e-16	7.96e-14
	regulation of DNA metabolic process (GO:0051052)	475	55	32.85	+	1.67	0.000595	0.0441
	embryonic morphogenesis (GO:0048598)	555	64	38.39	+	1.67	0.000226	0.0191
	spermatogenesis (GO:0007283)	544	62	37.63	+	1.65	0.000378	0.0304
	supramolecular fiber organization (GO:0097435)	521	59	36.03	+	1.64	0.00055	0.042
	regulation of cellular metabolic process (GO:0031323)	4911	556	339.67	+	1.64	2.52e-38	3.47e-35
	positive regulation of nitrogen compound metabolic process (GO:0051173)	2837	321	196.22	+	1.64	1.17e-18	6.11e-16
	positive regulation of cellular metabolic process (GO:0031325)	2698	305	186.61	+	1.63	1.86e-17	8.05e-15
	regulation of nitrogen compound metabolic process (GO:0051171)	5056	571	349.7	+	1.63	1.68e-39	2.54e-36
	positive regulation of gene expression (GO:0010628)	1065	120	73.66	+	1.63	6.38e-07	8.39e-05
	negative regulation of macromolecule metabolic process (GO:0010605)	2477	279	171.32	+	1.63	1.01e-15	3.73e-13
	negative regulation of gene expression (GO:0010629)	853	96	59	+	1.63	1.24e-05	0.00126
	male gamete generation (GO:0048232)	561	63	38.8	+	1.62	0.00046	0.0354
	embryo development (GO:0009790)	971	108	67.16	+	1.61	5.04e-06	0.000552
	regulation of primary metabolic process (GO:0080090)	5198	574	359.52	+	1.6	4.91e-37	6.18e-34
	regulation of catabolic process (GO:0009894)	877	96	60.66	+	1.58	2.95e-05	0.00284
	cytoskeleton organization (GO:0007010)	1118	122	77.33	+	1.58	2.64e-06	0.000296
	positive regulation of macromolecule metabolic process (GO:0010604)	3173	345	219.46	+	1.57	1.06e-17	4.69e-15
	negative regulation of metabolic process (GO:0009892)	2671	290	184.74	+	1.57	1.79e-14	5.75e-12
	regulation of macromolecule metabolic process (GO:0060255)	5513	597	381.31	+	1.57	9.13e-37	1.06e-33
	tissue development (GO:0009888)	1544	167	106.79	+	1.56	3.61e-08	5.99e-06
	gamete generation (GO:0007276)	693	74	47.93	+	1.54	0.000526	0.0403
	nucleobase-containing compound metabolic process (GO:0006139)	2326	243	160.88	+	1.51	2.52e-10	5.43e-08
	positive regulation of metabolic process (GO:0009893)	3423	355	236.75	+	1.5	2.4e-15	8.41e-13
	regulation of metabolic process (GO:0019222)	5927	610	409.94	+	1.49	2.22e-31	2.24e-28
	gene expression (GO:0010467)	2065	209	142.83	+	1.46	6.34e-08	1.02e-05
	heterocycle metabolic process (GO:0046483)	2451	247	169.52	+	1.46	3.78e-09	7.31e-07
	cellular aromatic compound metabolic process (GO:0006725)	2474	247	171.11	+	1.44	9.16e-09	1.69e-06
	animal organ development (GO:0048513)	2602	250	179.97	+	1.39	1.49e-07	2.21e-05
	cellular nitrogen compound metabolic process (GO:0034641)	2738	259	189.37	+	1.37	3.2e-07	4.48e-05
	organic cyclic compound metabolic process (GO:1901360)	2656	248	183.7	+	1.35	1.58e-06	0.000187
	cellular developmental process (GO:0048869)	3246	301	224.51	+	1.34	1.25e-07	1.89e-05
	cell differentiation (GO:0030154)	3225	299	223.06	+	1.34	1.43e-07	2.15e-05
	negative regulation of cellular process (GO:0048523)	4232	379	292.71	+	1.29	4.13e-08	6.78e-06
	regulation of developmental process (GO:0050793)	2270	203	157	+	1.29	0.000246	0.0205
	developmental process (GO:0032502)	5084	446	351.63	+	1.27	1.04e-08	1.85e-06
	positive regulation of cellular process (GO:0048522)	4910	425	339.6	+	1.25	1.86e-07	2.73e-05
	negative regulation of biological process (GO:0048519)	4726	405	326.87	+	1.24	1.36e-06	0.000164
	anatomical structure development (GO:0048856)	4615	392	319.2	+	1.23	6.04e-06	0.000651
	positive regulation of biological process (GO:0048518)	5518	461	381.65	+	1.21	2.22e-06	0.000253
	multicellular organism development (GO:0007275)	3574	298	247.19	+	1.21	0.000573	0.0431
	regulation of cellular process (GO:0050794)	9418	783	651.39	+	1.2	1.03e-14	3.39e-12
	cellular component organization (GO:0016043)	4851	403	335.52	+	1.2	3.21e-05	0.00307
	cellular component organization or biogenesis (GO:0071840)	5028	414	347.76	+	1.19	5.12e-05	0.00481
	biological regulation (GO:0065007)	10358	837	716.41	+	1.17	2.34e-13	6.54e-11
	regulation of biological process (GO:0050789)	10041	811	694.48	+	1.17	2.71e-12	6.94e-10
	macromolecule metabolic process (GO:0043170)	5111	410	353.5	+	1.16	0.000586	0.0436
	biological_process (GO:0008150)	14694	1053	1016.31	+	1.04	0.000427	0.0334
	localization (GO:0051179)	3877	210	268.15	-	0.78	6.39e-05	0.00588
	organonitrogen compound metabolic process (GO:1901564)	4009	215	277.28	-	0.78	2.23e-05	0.00218
	establishment of localization (GO:0051234)	3371	166	233.15	-	0.71	7.66e-07	9.72e-05
	transport (GO:0006810)	3228	158	223.26	-	0.71	1.11e-06	0.000137
	Unclassified (UNCLASSIFIED)	1745	84	120.69	-	0.7	0.000427	0.0332
	nitrogen compound transport (GO:0071705)	1387	64	95.93	-	0.67	0.000655	0.0478
	biological process involved in interspecies interaction between organisms (GO:0044419)	1261	54	87.22	-	0.62	0.000182	0.0157
	response to biotic stimulus (GO:0009607)	1139	48	78.78	-	0.61	0.000237	0.0199
	response to other organism (GO:0051707)	1096	46	75.8	-	0.61	0.000296	0.0243
	response to external biotic stimulus (GO:0043207)	1098	46	75.94	-	0.61	0.000297	0.0241
	defense response to other organism (GO:0098542)	797	30	55.12	-	0.54	0.000364	0.0294
	defense response (GO:0006952)	1171	44	80.99	-	0.54	9.31e-06	0.000963
	vesicle-mediated transport (GO:0016192)	1118	40	77.33	-	0.52	4.27e-06	0.000471
	immune system process (GO:0002376)	1899	67	131.34	-	0.51	3.71e-10	7.68e-08
	immune response (GO:0006955)	1345	42	93.03	-	0.45	3.64e-09	7.14e-07
	taxis (GO:0042330)	464	14	32.09	-	0.44	0.00064	0.0469
	chemotaxis (GO:0006935)	462	13	31.95	-	0.41	0.000296	0.0242
	inflammatory response (GO:0006954)	474	13	32.78	-	0.4	0.00017	0.0147
	G protein-coupled receptor signaling pathway (GO:0007186)	739	20	51.11	-	0.39	1.62e-06	0.000189
	mitochondrion organization (GO:0007005)	366	9	25.31	-	0.36	0.000417	0.0328
	lipid metabolic process (GO:0006629)	887	21	61.35	-	0.34	6.04e-09	1.13e-06
	amide metabolic process (GO:0043603)	606	14	41.91	-	0.33	1.64e-06	0.000189
	cellular lipid metabolic process (GO:0044255)	655	15	45.3	-	0.33	5.06e-07	6.76e-05
	lipid biosynthetic process (GO:0008610)	439	10	30.36	-	0.33	3.9e-05	0.0037
	organonitrogen compound biosynthetic process (GO:1901566)	977	21	67.57	-	0.31	7.59e-11	1.79e-08
	organophosphate biosynthetic process (GO:0090407)	395	7	27.32	-	0.26	1.23e-05	0.00125
	organophosphate metabolic process (GO:0019637)	651	11	45.03	-	0.24	3.9e-09	7.46e-07
	oxoacid metabolic process (GO:0043436)	539	9	37.28	-	0.24	8.04e-08	1.28e-05
	organic acid metabolic process (GO:0006082)	544	9	37.63	-	0.24	8.43e-08	1.33e-05
	regulation of leukocyte proliferation (GO:0070663)	242	4	16.74	-	0.24	0.000577	0.0431
	carbohydrate metabolic process (GO:0005975)	312	5	21.58	-	0.23	6.78e-05	0.00621
	carbohydrate derivative metabolic process (GO:1901135)	695	11	48.07	-	0.23	3.62e-10	7.6e-08
	carboxylic acid metabolic process (GO:0019752)	528	8	36.52	-	0.22	3.4e-08	5.77e-06
	regulation of ERK1 and ERK2 cascade (GO:0070372)	267	4	18.47	-	0.22	0.00015	0.0131
	small molecule metabolic process (GO:0044281)	1098	16	75.94	-	0.21	1.36e-16	5.42e-14
	small molecule biosynthetic process (GO:0044283)	279	4	19.3	-	0.21	7.55e-05	0.00687
	carbohydrate derivative biosynthetic process (GO:1901137)	419	6	28.98	-	0.21	6.81e-07	8.8e-05
	purine nucleotide metabolic process (GO:0006163)	274	3	18.95	-	0.16	2.02e-05	0.00199
	adaptive immune response (GO:0002250)	558	6	38.59	-	0.16	2.81e-10	5.98e-08
	purine-containing compound metabolic process (GO:0072521)	296	3	20.47	-	0.15	7.23e-06	0.000759
	small molecule catabolic process (GO:0044282)	198	2	13.69	-	0.15	0.000387	0.031
	nucleotide metabolic process (GO:0009117)	318	3	21.99	-	0.14	1.62e-06	0.000188
	nucleoside phosphate metabolic process (GO:0006753)	324	3	22.41	-	0.13	1.12e-06	0.000138
	purine ribonucleotide metabolic process (GO:0009150)	236	2	16.32	-	0.12	2.83e-05	0.00276
	nucleobase-containing small molecule metabolic process (GO:0055086)	360	3	24.9	-	0.12	1.22e-07	1.87e-05
	ribonucleotide metabolic process (GO:0009259)	251	2	17.36	-	0.12	1.38e-05	0.00138
	ribose phosphate metabolic process (GO:0019693)	253	2	17.5	-	0.11	1.43e-05	0.00143
	regulation of leukocyte migration (GO:0002685)	198	1	13.69	-	0.07	5.62e-05	0.00524
	sulfur compound metabolic process (GO:0006790)	205	0	14.18	-	< 0.01	2.1e-06	0.00024
	amino acid metabolic process (GO:0006520)	186	0	12.86	-	< 0.01	6.85e-06	0.000723
	alpha-amino acid metabolic process (GO:1901605)	123	0	8.51	-	< 0.01	0.000602	0.0444
	regulation of lipid localization (GO:1905952)	145	0	10.03	-	< 0.01	0.000115	0.0102
	regulation of lipid transport (GO:0032368)	119	0	8.23	-	< 0.01	0.000562	0.0426

## Sheet: CELLULAR_FUNCTION
		Analysis Type:	PANTHER Overrepresentation Test (Released 20221013)
		Annotation Version and Release Date:	GO Ontology database DOI: 10.5281/zenodo.7709866 Released 2023-03-06
		Analyzed List:	UniProt_IDs_with_collased_IDR_regions.txt (Homo sapiens)
		Reference List:	background_proteins2.txt (Homo sapiens)
		Test Type:	FISHER
		Correction:	FDR
		GO molecular function complete	background_proteins2.txt - REFLIST (16439)	UniProt_IDs_with_collased_IDR_regions.txt (1137)	UniProt_IDs_with_collased_IDR_regions.txt (expected)	UniProt_IDs_with_collased_IDR_regions.txt (over/under)	UniProt_IDs_with_collased_IDR_regions.txt (fold Enrichment)	UniProt_IDs_with_collased_IDR_regions.txt (raw P-value)	UniProt_IDs_with_collased_IDR_regions.txt (FDR)
		histone H3K4 monomethyltransferase activity (GO:0140945)	7	6	0.48	+	12.39	8.36e-05	0.00575
		histone H3K27 methyltransferase activity (GO:0046976)	6	5	0.41	+	12.05	0.000373	0.0219
		RNA polymerase II C-terminal domain binding (GO:0099122)	7	5	0.48	+	10.33	0.000606	0.0315
		N6-methyladenosine-containing RNA binding (GO:1990247)	11	7	0.76	+	9.2	7.87e-05	0.00549
		pre-mRNA intronic binding (GO:0097157)	13	8	0.9	+	8.9	2.85e-05	0.00231
		intermediate filament binding (GO:0019215)	11	6	0.76	+	7.89	0.000482	0.0269
		structural constituent of skin epidermis (GO:0030280)	34	18	2.35	+	7.65	1.79e-09	4e-07
		histone H3K4 methyltransferase activity (GO:0042800)	17	9	1.18	+	7.65	2.2e-05	0.00185
		ATP-dependent chromatin remodeler activity (GO:0140658)	37	17	2.56	+	6.64	2.59e-08	4.82e-06
		molecular condensate scaffold activity (GO:0140693)	24	10	1.66	+	6.02	3.87e-05	0.00303
		histone H3 methyltransferase activity (GO:0140938)	36	14	2.49	+	5.62	2.16e-06	0.000247
		RNA polymerase II complex binding (GO:0000993)	32	12	2.21	+	5.42	1.54e-05	0.00141
		high voltage-gated calcium channel activity (GO:0008331)	24	9	1.66	+	5.42	0.00018	0.0115
		mRNA 3'-UTR binding (GO:0003730)	96	35	6.64	+	5.27	2.85e-13	7.07e-11
		basal RNA polymerase II transcription machinery binding (GO:0001099)	56	19	3.87	+	4.91	1.95e-07	2.56e-05
		basal transcription machinery binding (GO:0001098)	56	19	3.87	+	4.91	1.95e-07	2.49e-05
		RNA polymerase II general transcription initiation factor binding (GO:0001091)	24	8	1.66	+	4.82	0.000778	0.0386
		pre-mRNA binding (GO:0036002)	37	12	2.56	+	4.69	5e-05	0.00378
		miRNA binding (GO:0035198)	31	10	2.14	+	4.66	0.000218	0.0134
		RNA polymerase core enzyme binding (GO:0043175)	38	12	2.63	+	4.57	6.19e-05	0.00453
		protein-lysine N-methyltransferase activity (GO:0016279)	50	15	3.46	+	4.34	1.28e-05	0.00122
		lysine N-methyltransferase activity (GO:0016278)	51	15	3.53	+	4.25	1.56e-05	0.0014
		RNA polymerase binding (GO:0070063)	56	16	3.87	+	4.13	1.11e-05	0.00108
		DNA secondary structure binding (GO:0000217)	36	10	2.49	+	4.02	0.000591	0.0311
		histone methyltransferase activity (GO:0042054)	54	15	3.73	+	4.02	2.75e-05	0.00227
		promoter-specific chromatin binding (GO:1990841)	62	16	4.29	+	3.73	3.22e-05	0.00257
		voltage-gated calcium channel activity (GO:0005245)	51	13	3.53	+	3.69	0.000193	0.012
		mRNA binding (GO:0003729)	297	75	20.54	+	3.65	4.96e-19	1.48e-16
		protein methyltransferase activity (GO:0008276)	77	19	5.33	+	3.57	1.04e-05	0.00104
		ATP-dependent activity, acting on DNA (GO:0008094)	114	28	7.88	+	3.55	9.95e-08	1.48e-05
		regulatory RNA binding (GO:0061980)	45	11	3.11	+	3.53	0.000796	0.0391
		transcription coactivator binding (GO:0001223)	46	11	3.18	+	3.46	0.000929	0.0446
		helicase activity (GO:0004386)	149	35	10.31	+	3.4	6.93e-09	1.41e-06
		single-stranded RNA binding (GO:0003727)	80	18	5.53	+	3.25	5.05e-05	0.00376
		beta-catenin binding (GO:0008013)	86	19	5.95	+	3.19	3.91e-05	0.00301
		RNA helicase activity (GO:0003724)	74	15	5.12	+	2.93	0.000549	0.0299
		methylated histone binding (GO:0035064)	74	15	5.12	+	2.93	0.000549	0.0296
		methylation-dependent protein binding (GO:0140034)	76	15	5.26	+	2.85	0.000699	0.0355
		ATP-dependent activity, acting on RNA (GO:0008186)	76	15	5.26	+	2.85	0.000699	0.0351
		histone binding (GO:0042393)	228	44	15.77	+	2.79	1.56e-08	3.04e-06
		transcription coactivator activity (GO:0003713)	249	46	17.22	+	2.67	2.6e-08	4.64e-06
		histone modifying activity (GO:0140993)	171	31	11.83	+	2.62	7.51e-06	0.000799
		transcription coregulator binding (GO:0001221)	111	20	7.68	+	2.61	0.000435	0.0246
		nuclear receptor binding (GO:0016922)	132	22	9.13	+	2.41	0.00041	0.0235
		chromatin binding (GO:0003682)	562	91	38.87	+	2.34	3.04e-12	7.14e-10
		transcription coregulator activity (GO:0003712)	450	71	31.12	+	2.28	2.03e-09	4.32e-07
		RNA binding (GO:0003723)	1481	232	102.43	+	2.26	3.03e-29	2.71e-26
		RNA polymerase II cis-regulatory region sequence-specific DNA binding (GO:0000978)	1161	176	80.3	+	2.19	1.85e-20	6.35e-18
		RNA polymerase II transcription regulatory region sequence-specific DNA binding (GO:0000977)	1289	193	89.15	+	2.16	6.02e-22	2.24e-19
		cis-regulatory region sequence-specific DNA binding (GO:0000987)	1182	176	81.75	+	2.15	1.13e-19	3.61e-17
		transcription corepressor activity (GO:0003714)	177	26	12.24	+	2.12	0.000799	0.0388
		transcription cis-regulatory region binding (GO:0000976)	1397	205	96.62	+	2.12	1.61e-22	8.99e-20
		transcription regulatory region nucleic acid binding (GO:0001067)	1399	205	96.76	+	2.12	2.63e-22	1.17e-19
		catalytic activity, acting on DNA (GO:0140097)	227	33	15.7	+	2.1	0.000189	0.0119
		sequence-specific double-stranded DNA binding (GO:1990837)	1470	211	101.67	+	2.08	4.48e-22	1.82e-19
		DNA-binding transcription activator activity, RNA polymerase II-specific (GO:0001228)	474	68	32.78	+	2.07	1.7e-07	2.38e-05
		DNA binding (GO:0003677)	2409	343	166.62	+	2.06	3.18e-37	7.11e-34
		DNA-binding transcription activator activity (GO:0001216)	478	68	33.06	+	2.06	1.93e-07	2.61e-05
		sequence-specific DNA binding (GO:0043565)	1576	224	109	+	2.05	5.03e-23	3.21e-20
		GTPase activator activity (GO:0005096)	261	37	18.05	+	2.05	0.000123	0.00795
		double-stranded DNA binding (GO:0003690)	1556	220	107.62	+	2.04	2.33e-22	1.16e-19
		nucleic acid binding (GO:0003676)	3710	519	256.6	+	2.02	5.39e-61	2.41e-57
		transcription regulator activity (GO:0140110)	1686	235	116.61	+	2.02	2.93e-23	2.18e-20
		RNA polymerase II-specific DNA-binding transcription factor binding (GO:0061629)	329	45	22.76	+	1.98	6.63e-05	0.00478
		transcription factor binding (GO:0008134)	572	77	39.56	+	1.95	2.15e-07	2.67e-05
		DNA-binding transcription factor activity, RNA polymerase II-specific (GO:0000981)	1185	158	81.96	+	1.93	7.11e-14	1.87e-11
		DNA-binding transcription factor activity (GO:0003700)	1241	165	85.83	+	1.92	1.78e-14	4.96e-12
		DNA-binding transcription factor binding (GO:0140297)	455	60	31.47	+	1.91	9.96e-06	0.00101
		heterocyclic compound binding (GO:1901363)	5267	580	364.29	+	1.59	3.37e-37	5.01e-34
		organic cyclic compound binding (GO:0097159)	5326	580	368.37	+	1.57	1.01e-35	1.13e-32
		metal ion binding (GO:0046872)	3741	342	258.75	+	1.32	3.88e-08	5.98e-06
		cation binding (GO:0043169)	3807	344	263.31	+	1.31	1.06e-07	1.52e-05
		ion binding (GO:0043167)	5200	423	359.66	+	1.18	0.000119	0.00792
		binding (GO:0005488)	13946	1021	964.57	+	1.06	2.44e-06	0.000273
		catalytic activity (GO:0003824)	4447	231	307.58	-	0.75	3.89e-07	4.69e-05
		hydrolase activity (GO:0016787)	1995	90	137.98	-	0.65	9.78e-06	0.00102
		signaling receptor binding (GO:0005102)	1315	58	90.95	-	0.64	0.000247	0.0149
		peptidase activity (GO:0008233)	561	18	38.8	-	0.46	0.000392	0.0227
		signaling receptor activity (GO:0038023)	1105	33	76.43	-	0.43	3.31e-08	5.48e-06
		molecular transducer activity (GO:0060089)	1105	33	76.43	-	0.43	3.31e-08	5.29e-06
		receptor ligand activity (GO:0048018)	419	12	28.98	-	0.41	0.000699	0.0359
		signaling receptor activator activity (GO:0030546)	426	12	29.46	-	0.41	0.000531	0.0293
		transmembrane signaling receptor activity (GO:0004888)	897	23	62.04	-	0.37	2.68e-08	4.6e-06
		signaling receptor regulator activity (GO:0030545)	472	12	32.65	-	0.37	7.3e-05	0.00518
		active transmembrane transporter activity (GO:0022804)	380	8	26.28	-	0.3	9.17e-05	0.00621
		oxidoreductase activity (GO:0016491)	471	9	32.58	-	0.28	3e-06	0.000327
		G protein-coupled receptor activity (GO:0004930)	460	8	31.82	-	0.25	1.38e-06	0.000162
		guanyl ribonucleotide binding (GO:0032561)	302	4	20.89	-	0.19	1.89e-05	0.00165
		guanyl nucleotide binding (GO:0019001)	302	4	20.89	-	0.19	1.89e-05	0.00162
		carbohydrate binding (GO:0030246)	234	3	16.18	-	0.19	0.000251	0.015
		GTP binding (GO:0005525)	283	3	19.57	-	0.15	1.46e-05	0.00136
		cytokine receptor binding (GO:0005126)	211	2	14.59	-	0.14	0.000123	0.00806
		structural constituent of ribosome (GO:0003735)	122	0	8.44	-	< 0.01	0.000586	0.0312

## Sheet: CELLULAR_COMPONENT
	Analysis Type:	PANTHER Overrepresentation Test (Released 20221013)
	Annotation Version and Release Date:	GO Ontology database DOI: 10.5281/zenodo.7709866 Released 2023-03-06
	Analyzed List:	UniProt_IDs_with_collased_IDR_regions.txt (Homo sapiens)
	Reference List:	background_proteins2.txt (Homo sapiens)
	Test Type:	FISHER
	Correction:	FDR
	GO cellular component complete	background_proteins2.txt - REFLIST (16439)	UniProt_IDs_with_collased_IDR_regions.txt (1137)	UniProt_IDs_with_collased_IDR_regions.txt (expected)	UniProt_IDs_with_collased_IDR_regions.txt (over/under)	UniProt_IDs_with_collased_IDR_regions.txt (fold Enrichment)	UniProt_IDs_with_collased_IDR_regions.txt (raw P-value)	UniProt_IDs_with_collased_IDR_regions.txt (FDR)
	messenger ribonucleoprotein complex (GO:1990124)	12	8	0.83	+	9.64	1.87e-05	0.000591
	CRD-mediated mRNA stability complex (GO:0070937)	6	4	0.41	+	9.64	0.00267	0.0464
	cornified envelope (GO:0001533)	43	20	2.97	+	6.72	1.3e-09	7.38e-08
	presynaptic active zone cytoplasmic component (GO:0098831)	17	6	1.18	+	5.1	0.00281	0.0485
	cytoplasmic stress granule (GO:0010494)	81	23	5.6	+	4.11	1.57e-07	6.87e-06
	Golgi cis cisterna (GO:0000137)	30	8	2.07	+	3.86	0.00256	0.0454
	spliceosomal complex (GO:0005681)	173	43	11.97	+	3.59	2.87e-11	2.77e-09
	histone methyltransferase complex (GO:0035097)	60	14	4.15	+	3.37	0.000244	0.00605
	voltage-gated calcium channel complex (GO:0005891)	52	12	3.6	+	3.34	0.000725	0.0165
	catalytic step 2 spliceosome (GO:0071013)	75	17	5.19	+	3.28	7.49e-05	0.00213
	keratin filament (GO:0045095)	95	21	6.57	+	3.2	1.55e-05	0.000516
	cytoplasmic ribonucleoprotein granule (GO:0036464)	218	47	15.08	+	3.12	2.24e-10	1.6e-08
	ribonucleoprotein granule (GO:0035770)	235	50	16.25	+	3.08	8.91e-11	7.47e-09
	P-body (GO:0000932)	78	16	5.39	+	2.97	0.000324	0.00772
	methyltransferase complex (GO:0034708)	86	17	5.95	+	2.86	0.000312	0.00762
	SWI/SNF superfamily-type complex (GO:0070603)	86	17	5.95	+	2.86	0.000312	0.00753
	nuclear matrix (GO:0016363)	109	21	7.54	+	2.79	8.91e-05	0.00249
	apical junction complex (GO:0043296)	135	24	9.34	+	2.57	0.000111	0.00294
	nuclear periphery (GO:0034399)	131	23	9.06	+	2.54	0.000176	0.00442
	tight junction (GO:0070160)	117	20	8.09	+	2.47	0.000617	0.0143
	nuclear speck (GO:0016607)	381	65	26.35	+	2.47	5.92e-10	3.57e-08
	bicellular tight junction (GO:0005923)	113	18	7.82	+	2.3	0.00209	0.0385
	intermediate filament cytoskeleton (GO:0045111)	228	34	15.77	+	2.16	0.000109	0.00292
	intermediate filament (GO:0005882)	197	28	13.63	+	2.05	0.000875	0.0192
	ribonucleoprotein complex (GO:1990904)	606	86	41.91	+	2.05	5.01e-09	2.48e-07
	nuclear body (GO:0016604)	771	108	53.33	+	2.03	8.11e-11	7.12e-09
	chromatin (GO:0000785)	1288	169	89.08	+	1.9	2.92e-14	4.33e-12
	nuclear protein-containing complex (GO:0140513)	1062	135	73.45	+	1.84	1.09e-10	8.41e-09
	transcription regulator complex (GO:0005667)	480	61	33.2	+	1.84	2.46e-05	0.000755
	chromosome (GO:0005694)	1800	220	124.5	+	1.77	1.66e-15	3.2e-13
	nucleus (GO:0005634)	6689	743	462.64	+	1.61	7.73e-59	1.49e-55
	nucleoplasm (GO:0005654)	3648	400	252.31	+	1.59	6.87e-22	6.63e-19
	nuclear lumen (GO:0031981)	3962	423	274.03	+	1.54	3.02e-21	1.94e-18
	supramolecular complex (GO:0099080)	1234	130	85.35	+	1.52	5.51e-06	0.000201
	nucleolus (GO:0005730)	889	88	61.49	+	1.43	0.0016	0.0305
	intracellular non-membrane-bounded organelle (GO:0043232)	4708	456	325.63	+	1.4	1.44e-15	3.48e-13
	non-membrane-bounded organelle (GO:0043228)	4709	456	325.7	+	1.4	1.45e-15	3.12e-13
	organelle lumen (GO:0043233)	4902	442	339.05	+	1.3	3.31e-10	2.2e-08
	intracellular organelle lumen (GO:0070013)	4902	442	339.05	+	1.3	3.31e-10	2.13e-08
	membrane-enclosed lumen (GO:0031974)	4902	442	339.05	+	1.3	3.31e-10	2.06e-08
	intracellular membrane-bounded organelle (GO:0043231)	10345	854	715.51	+	1.19	2.69e-17	1.04e-14
	intracellular organelle (GO:0043229)	11333	921	783.84	+	1.17	5.88e-19	2.84e-16
	membrane-bounded organelle (GO:0043227)	11225	885	776.37	+	1.14	4.81e-12	5.46e-10
	intracellular anatomical structure (GO:0005622)	12570	984	869.4	+	1.13	1.95e-16	6.26e-14
	organelle (GO:0043226)	11988	938	829.15	+	1.13	2.28e-13	3.15e-11
	cytoplasm (GO:0005737)	10002	640	691.79	-	0.93	0.00259	0.0454
	membrane (GO:0016020)	8082	423	558.99	-	0.76	5.14e-15	8.27e-13
	extracellular exosome (GO:0070062)	1621	80	112.12	-	0.71	0.00153	0.0297
	extracellular vesicle (GO:1903561)	1642	80	113.57	-	0.7	0.000941	0.0204
	extracellular organelle (GO:0043230)	1643	80	113.64	-	0.7	0.000943	0.0202
	extracellular membrane-bounded organelle (GO:0065010)	1643	80	113.64	-	0.7	0.000943	0.02
	plasma membrane (GO:0005886)	4896	228	338.63	-	0.67	6.94e-13	8.93e-11
	cell periphery (GO:0071944)	5346	245	369.75	-	0.66	2.7e-15	4.75e-13
	endoplasmic reticulum (GO:0005783)	1674	75	115.78	-	0.65	4.96e-05	0.00147
	plasma membrane region (GO:0098590)	1185	53	81.96	-	0.65	0.000771	0.0171
	endomembrane system (GO:0012505)	3994	177	276.24	-	0.64	3.7e-12	4.46e-10
	vesicle (GO:0031982)	3269	144	226.1	-	0.64	6.13e-10	3.59e-08
	organelle membrane (GO:0031090)	3028	122	209.43	-	0.58	6.37e-12	6.83e-10
	Golgi apparatus (GO:0005794)	1432	57	99.04	-	0.58	4.55e-06	0.000172
	extracellular space (GO:0005615)	2680	106	185.36	-	0.57	4.64e-11	4.27e-09
	extracellular region (GO:0005576)	3453	131	238.83	-	0.55	4.68e-16	1.29e-13
	cilium (GO:0005929)	639	24	44.2	-	0.54	0.00161	0.0304
	intracellular vesicle (GO:0097708)	2145	79	148.36	-	0.53	1.59e-10	1.18e-08
	cytoplasmic vesicle (GO:0031410)	2141	78	148.08	-	0.53	1.08e-10	8.71e-09
	mitochondrion (GO:0005739)	1344	47	92.96	-	0.51	1.52e-07	6.82e-06
	receptor complex (GO:0043235)	490	17	33.89	-	0.5	0.00239	0.0431
	membrane protein complex (GO:0098796)	1092	37	75.53	-	0.49	1.28e-06	5.04e-05
	secretory vesicle (GO:0099503)	874	29	60.45	-	0.48	1.09e-05	0.00037
	bounding membrane of organelle (GO:0098588)	1802	58	124.63	-	0.47	1.71e-11	1.74e-09
	secretory granule (GO:0030141)	722	22	49.94	-	0.44	1.75e-05	0.000562
	cytoplasmic vesicle membrane (GO:0030659)	1076	31	74.42	-	0.42	2.13e-08	1e-06
	vesicle membrane (GO:0012506)	1091	31	75.46	-	0.41	1.23e-08	5.93e-07
	extracellular matrix (GO:0031012)	533	15	36.86	-	0.41	9.21e-05	0.00254
	external encapsulating structure (GO:0030312)	534	15	36.93	-	0.41	9.25e-05	0.00251
	mitochondrial membrane (GO:0031966)	571	16	39.49	-	0.41	5.21e-05	0.0015
	cell surface (GO:0009986)	894	25	61.83	-	0.4	1.91e-07	8.21e-06
	mitochondrial envelope (GO:0005740)	611	16	42.26	-	0.38	9.66e-06	0.000333
	secretory granule membrane (GO:0030667)	281	7	19.44	-	0.36	0.00241	0.043
	side of membrane (GO:0098552)	573	14	39.63	-	0.35	7.27e-06	0.00026
	membrane raft (GO:0045121)	297	7	20.54	-	0.34	0.00134	0.0269
	membrane microdomain (GO:0098857)	298	7	20.61	-	0.34	0.00135	0.0266
	endocytic vesicle (GO:0030139)	301	7	20.82	-	0.34	0.000984	0.0206
	endosome (GO:0005768)	928	20	64.18	-	0.31	2.57e-10	1.77e-08
	Golgi membrane (GO:0000139)	536	11	37.07	-	0.3	1.38e-06	5.33e-05
	secretory granule lumen (GO:0034774)	245	5	16.95	-	0.3	0.00168	0.0315
	cytoplasmic vesicle lumen (GO:0060205)	247	5	17.08	-	0.29	0.00171	0.0317
	collagen-containing extracellular matrix (GO:0062023)	397	8	27.46	-	0.29	3.5e-05	0.00106
	vesicle lumen (GO:0031983)	249	5	17.22	-	0.29	0.00122	0.025
	lytic vacuole membrane (GO:0098852)	350	7	24.21	-	0.29	0.000116	0.00298
	lysosomal membrane (GO:0005765)	350	7	24.21	-	0.29	0.000116	0.00294
	late endosome (GO:0005770)	266	5	18.4	-	0.27	0.000657	0.0151
	vacuole (GO:0005773)	706	13	48.83	-	0.27	3.78e-09	1.97e-07
	vacuolar membrane (GO:0005774)	384	7	26.56	-	0.26	1.65e-05	0.000541
	plasma membrane signaling receptor complex (GO:0098802)	280	5	19.37	-	0.26	0.00035	0.00824
	external side of plasma membrane (GO:0009897)	397	7	27.46	-	0.25	8.6e-06	0.000302
	mitochondrial matrix (GO:0005759)	415	7	28.7	-	0.24	4.64e-06	0.000172
	endosome membrane (GO:0010008)	486	8	33.61	-	0.24	3.66e-07	1.54e-05
	lytic vacuole (GO:0000323)	626	10	43.3	-	0.23	3.27e-09	1.8e-07
	lysosome (GO:0005764)	626	10	43.3	-	0.23	3.27e-09	1.75e-07
	organelle inner membrane (GO:0019866)	426	6	29.46	-	0.2	4.84e-07	1.99e-05
	early endosome membrane (GO:0031901)	184	2	12.73	-	0.16	0.000769	0.0173
	early endosome (GO:0005769)	391	4	27.04	-	0.15	1.3e-07	5.99e-06
	late endosome membrane (GO:0031902)	132	1	9.13	-	0.11	0.00228	0.0415
	ribosomal subunit (GO:0044391)	139	1	9.61	-	0.1	0.00157	0.0304
	vacuolar lumen (GO:0005775)	148	1	10.24	-	0.1	0.00112	0.0233
	recycling endosome (GO:0055037)	184	1	12.73	-	0.08	0.000115	0.003
	mitochondrial inner membrane (GO:0005743)	378	2	26.14	-	0.08	4.88e-09	2.48e-07
	inner mitochondrial membrane protein complex (GO:0098800)	111	0	7.68	-	< 0.01	0.00134	0.0267
	melanosome (GO:0042470)	98	0	6.78	-	< 0.01	0.00293	0.0495
	T cell receptor complex (GO:0042101)	108	0	7.47	-	< 0.01	0.00126	0.0257
	immunoglobulin complex (GO:0019814)	155	0	10.72	-	< 0.01	5.04e-05	0.00147
	mitochondrial protein-containing complex (GO:0098798)	222	0	15.35	-	< 0.01	6.18e-07	2.48e-05
	recycling endosome membrane (GO:0055038)	97	0	6.71	-	< 0.01	0.00287	0.049
	endocytic vesicle membrane (GO:0030666)	169	0	11.69	-	< 0.01	2.32e-05	0.000722
	pigment granule (GO:0048770)	98	0	6.78	-	< 0.01	0.00293	0.0491
